# Supplementary material
Source: publisher site journal article supplement (https://www.dovepress.com/article/310017)
Supplement: Supplementary file 1 [file get_supplementary_file.php]

# Supplementary Materials

## Supplementary Tables

**Table S1.** The optimal cutoffs and respective LASSO regression coefficients of selected markers in the training cohort.

**Table S2.** Patient characteristics stratified by the circulating inflammation signature (CISIG) in the training cohort.

**Table S3.** Patient characteristics stratified by the circulating inflammation signature (CISIG) in the validation cohort.

**Table S4.** Patient characteristics stratified by treatment in matched patients derived from the training cohort (limited to stage III & IV patients with RT alone patients excluded).

**Table S5.** Patient characteristics stratified by treatment in matched patients derived from the validation cohort (limited to stage III & IV patients with RT alone patients excluded).

## Supplementary Figures

**Figure S1.** Cutoff of circulating inflammation biomarkers determined by the Maximally Selected Rank Statistics and survival curves stratified by these cutoffs (a, hyaluronidase [HA]; b, IV collagen [CIV]; c, laminin [LN]; d, procollagen III [PIIIPN.P]; e, neutrophil to lymphocyte ratio [NLR]; f, platelet to lymphocyte ratio [PLR]; g, lymphocyte to monocyte ratio [LMR]; h, high-density lipoprotein [HDL]; i, lactate dehydrogenase [LDH]; j, C-reactive protein [CRP] to albumin ratio [CRP/ALB]).

**Figure S2.** Cutoff of circulating inflammation signature (CISIG) determined by the Maximally Selected Rank Statistics.

**Figure S3.** Decision curve analyses of the nomogram at 3- and 5-year in training and validation cohort. (a) at 3-year in the training cohort. (b) at 5-year in the training cohort. (c) at 3-year in the validation cohort. (d) at 5-year in the validation cohort.

**Figure S4.** Survival curves of disease-free survival by treatment in matched patients with high or low circulating inflammation signature (CISIG) derived from the training (a) and validation cohorts (b).

**Table S1.** The optimal cutoffs and respective LASSO regression coefficients of selected markers in the training cohort.

| Markers | Cutoff | Coefficient | Log-rank P value |
|---------|--------|-------------|------------------|
| HA      | 66.79  | 0.263       | 0.024            |
| LN      | 26.14  | -0.218      | 0.092            |
| PIIINP  | 18.3   | -0.468      | 0.002            |
| NLR     | 1.48   | -0.212      | 0.380            |
| PLR     | 149.29 | -0.347      | 0.057            |
| LMR     | 2.5    | -0.691      | 0.004            |
| HDL     | 1.38   | -0.214      | 0.022            |
| LDH     | 149.9  | 0.488       | 0.003            |
| CRP/ALB | 0.01   | 0.659       | <0.001           |

Abbreviation: HA, hyaluronidase; CIV, IV collagen; LN, laminin; PIIINP, procollagen III; NLR, neutrophil to lymphocyte ratio; PLR, platelet to lymphocyte ratio; LMR, lymphocyte to monocyte ratio; HDL, high-density lipoprotein; LDH, lactate dehydrogenase; CRP/ALB, C-reactive protein (CRP) to albumin ratio.

**Table S2.** Patient characteristics stratified by the CISIG in the training cohort.

| Variable          | Low CISIG<br>(N=427) | High CISIG<br>(N=265) | P value |
|-------------------|----------------------|-----------------------|---------|
| Age, median [IQR] | 43 [36.5, 51]        | 47 [40, 54]           | 0.001   |
| Sex               |                      |                       |         |
| Female            | 138 (32.3)           | 42 (15.8)             | <0.001  |
| Male              | 289 (67.7)           | 223 (84.2)            |         |
| Smoking           |                      |                       | 0.004   |
| No                | 271 (63.5)           | 139 (52.5)            |         |
| Yes               | 156 (36.5)           | 126 (47.5)            |         |
| BMI, median [IQR] | 19.83 [18.69, 21.09] | 19.36 [18.47, 20.45]  | 0.003   |
| Histology         |                      |                       | 0.640   |
| Type I            | 2(0.5)               | 2(0.8)                |         |
| Type II           | 425(99.5)            | 263(99.2)             |         |
| T stage           |                      |                       | 0.029   |
| T1                | 23(5.4)              | 13(4.9)               |         |
| T2                | 34(8.0)              | 14(5.3)               |         |
| T3                | 255(59.7)            | 139(52.5)             |         |
| T4                | 115(26.9)            | 99(37.4)              |         |
| N stage           |                      |                       | 0.187   |
| N0                | 51(11.9)             | 30(11.3)              |         |
| N1                | 169(39.6)            | 87(32.8)              |         |
| N2                | 125(29.3)            | 97(36.6)              |         |
| N3                | 82(19.2)             | 51(19.2)              |         |
| Clinical Stage    |                      |                       | 0.002   |
| I                 | 6(1.4)               | 9(3.4)                |         |
| II                | 35(8.2)              | 7(2.6)                |         |
| III               | 207(48.5)            | 116(43.8)             |         |
| IV                | 179(41.9)            | 133(50.2)             |         |
| EBV DNA Level     |                      |                       | 0.002   |
| 0-999             | 253(59.3)            | 122(46.0)             |         |
| 1000-9999         | 98(23.0)             | 65(24.5)              |         |
| 10000-99999       | 57(13.3)             | 54(20.4)              |         |
| 100000-999999     | 17(4.0)              | 21(7.9)               |         |
| $\geq$ 10000000   | 2(0.5)               | 3(1.1)                |         |
| Treatment         |                      |                       | 0.101   |
| RT only           | 37(8.7)              | 23(8.7)               |         |
| CCRT              | 198(46.4)            | 144 (54.3)            |         |
| ICT+CCRT          | 192 (45.0)           | 98 (37.0)             |         |

Abbreviation: CISIG, circulating inflammation signature; IQR, interquartile range; BMI, body mass index; EBV DNA, Epstein–Barr virus DNA; RT, radiotherapy; CCRT, concurrent chemo-radiotherapy; ICT, induction chemotherapy.

**Table S3.** Patient characteristics stratified by the CISIG in the validation cohort.

| Variable          | Low CISIG<br>(N=286) | High CISIG<br>(N=171) | P value |
|-------------------|----------------------|-----------------------|---------|
| Age, median [IQR] | 44 [36, 51]          | 47 [39.5, 53]         | 0.004   |
| Sex               |                      |                       | 0.114   |
| Female            | 81 (28.3)            | 37 (21.6)             |         |
| Male              | 205 (71.7)           | 134 (78.4)            |         |
| Smoking           |                      |                       | 0.001   |
| No                | 179 (62.6)           | 79 (46.2)             |         |
| Yes               | 107 (37.4)           | 92 (53.8)             |         |
| BMI, median [IQR] | 19.60 [18.60, 21.09] | 19.60 [18.47, 21.09]  | 0.638   |
| Histology         |                      |                       | 1.000   |
| Type I            | 2(0.7)               | 1(0.6)                |         |
| Type II           | 284(99.3)            | 170(99.4)             |         |
| T stage           |                      |                       | 0.105   |
| T1                | 15(5.2)              | 10(5.8)               |         |
| T2                | 20(7.0)              | 12(7.0)               |         |
| T3                | 183(64.0)            | 91(53.2)              |         |
| T4                | 68(23.8)             | 58(33.9)              |         |
| N stage           |                      |                       | 0.084   |
| N0                | 27(9.4)              | 16(9.4)               |         |
| N1                | 101(35.3)            | 52(30.4)              |         |
| N2                | 111(38.8)            | 58(33.9)              |         |
| N3                | 47(16.4)             | 45(26.3)              |         |
| Clinical Stage    |                      |                       | 0.005   |
| I                 | 4(1.4)               | 3(1.8)                |         |
| II                | 14(4.9)              | 8(4.7)                |         |
| III               | 162(56.6)            | 69(40.4)              |         |
| IV                | 106(37.1)            | 91(53.2)              |         |
| EBV DNA Level     |                      |                       | 0.058   |
| 0-999             | 152(53.1)            | 73(42.7)              |         |
| 1000-9999         | 67(23.4)             | 49(28.7)              |         |
| 10000-99999       | 53(18.5)             | 32(18.7)              |         |
| 100000-999999     | 10(3.5)              | 15(8.8)               |         |
| $\geq$ 10000000   | 4(1.4)               | 2(1.2)                |         |
| Treatment         |                      |                       | 0.033   |
| RT                | 21(7.3)              | 17(9.9)               |         |
| CCRT              | 138 (48.3)           | 99 (57.9)             |         |
| NACT+CCRT         | 127 (44.4)           | 55 (32.2)             |         |

Abbreviation: CISIG, circulating inflammation signature; IQR, interquartile range; BMI, body mass index; EBV DNA, Epstein–Barr virus DNA; RT, radiotherapy; CCRT, concurrent chemo-radiotherapy; NACT, neoadjuvant chemotherapy.

**Table S4.** Patient characteristics stratified by treatment in matched patients derived from the training cohort (limited to stage III & IV patients with RT alone patients excluded).

| Variable       | CCRT<br>(N=168) | ICT plus CCRT<br>(N=168) | <i>P</i> value |
|----------------|-----------------|--------------------------|----------------|
| Age            |                 |                          | 0.582          |
| >45            | 76 (45.2%)      | 70 (41.7%)               |                |
| ≤45            | 92 (54.8%)      | 98 (58.3%)               |                |
| Sex            |                 |                          | 1.000          |
| Female         | 44 (26.2%)      | 44 (26.2%)               |                |
| Male           | 124 (73.8%)     | 124 (73.8%)              |                |
| Smoking        |                 |                          | 0.580          |
| No             | 101 (60.1%)     | 95 (56.5%)               |                |
| Yes            | 67 (39.9%)      | 73 (43.5%)               |                |
| BMI, mean ± SD | 19.8 ± 1.69     | 19.8 ± 1.69              | 0.996          |
| Histology      | 168 (100%)      | 168 (100%)               | 1.000.         |
| T stage        |                 |                          | 0.565          |
| T1             | 2 (1.19%)       | 1 (0.60%)                |                |
| T2             | 6 (3.57%)       | 10 (5.95%)               |                |
| T3             | 121 (72.0%)     | 112 (66.7%)              |                |
| T4             | 39 (23.2%)      | 45 (26.8%)               |                |
| N stage        |                 |                          | 0.658          |
| N0             | 9 (5.36%)       | 9 (5.36%)                |                |
| N1             | 56 (33.3%)      | 51 (30.4%)               |                |
| N2             | 61 (36.3%)      | 72 (42.9%)               |                |
| N3             | 42 (25.0%)      | 36 (21.4%)               |                |
| Clinical Stage |                 |                          | 0.826          |
| III            | 95 (56.5%)      | 92 (54.8%)               |                |
| IV             | 73 (43.5%)      | 76 (45.2%)               |                |

Abbreviation: BMI, body mass index; SD, standard deviation; CCRT, concurrent chemo-radiotherapy; ICT, induction chemotherapy.

**Table S5.** Patient characteristics stratified by treatment in matched patients derived from the validation cohort (limited to stage III & IV patients with RT alone patients excluded).

| Variable       | CCRT<br>(N=113) | ICT plus CCRT<br>(N=113) | <i>P</i> value |
|----------------|-----------------|--------------------------|----------------|
| Age            |                 |                          | 0.894          |
| >45            | 57 (50.4%)      | 55 (48.7%)               |                |
| ≤45            | 56 (49.6%)      | 58 (51.3%)               |                |
| Sex            |                 |                          | 0.306          |
| Female         | 29 (25.7%)      | 37 (32.7%)               |                |
| Male           | 84 (74.3%)      | 76 (67.3%)               |                |
| Smoking        |                 |                          | 0.500          |
| No             | 69 (61.1%)      | 63 (55.8%)               |                |
| Yes            | 44 (38.9%)      | 50 (44.2%)               |                |
| BMI, mean ± SD | 19.8 ± 1.88     | 20.0 ± 1.65              | 0.398          |
| Histology      |                 |                          | 1.000          |
| Type I         | 0 (0.00%)       | 1 (0.9%)                 |                |
| Type II        | 113 (100%)      | 112 (99.1%)              |                |
| T stage        |                 |                          | 0.810          |
| T1             | 4 (3.54%)       | 4 (3.54%)                |                |
| T2             | 5 (4.42%)       | 3 (2.65%)                |                |
| T3             | 79 (69.9%)      | 76 (67.3%)               |                |
| T4             | 25 (22.1%)      | 30 (26.5%)               |                |
| N stage        |                 |                          | 0.857          |
| N0             | 8 (7.08%)       | 6 (5.31%)                |                |
| N1             | 36 (31.9%)      | 33 (29.2%)               |                |
| N2             | 53 (46.9%)      | 59 (52.2%)               |                |
| N3             | 16 (14.2%)      | 15 (13.3%)               |                |
| Clinical Stage |                 |                          | 0.678          |
| III            | 74 (65.5%)      | 70 (61.9%)               |                |
| IV             | 39 (34.5%)      | 43 (38.1%)               |                |

Abbreviation: BMI, body mass index; SD, standard deviation; CCRT, concurrent chemo-radiotherapy; ICT, induction chemotherapy.

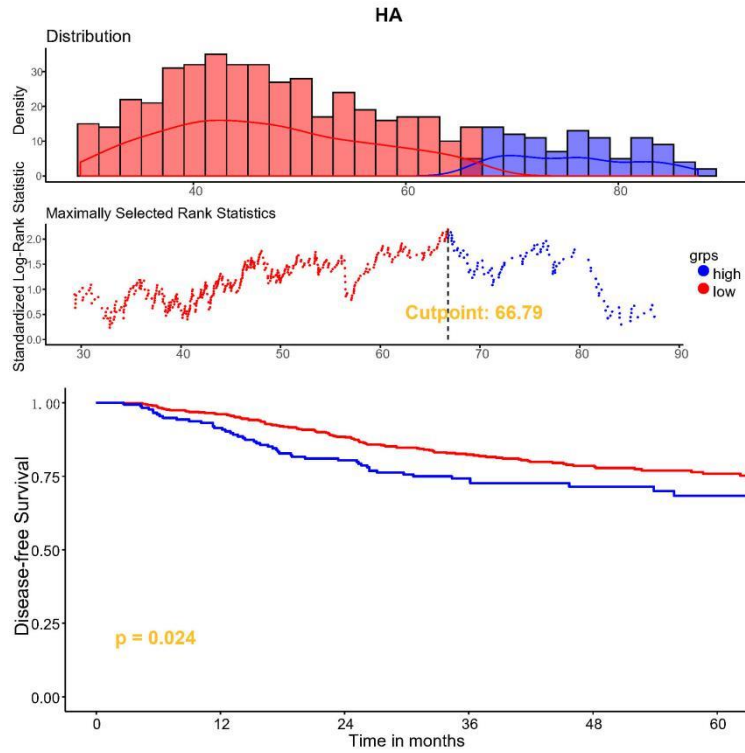

**Figure S1a.** Cutoff of HA determined by the Maximally Selected Rank Statistics and survival curves stratified by the cutoff.

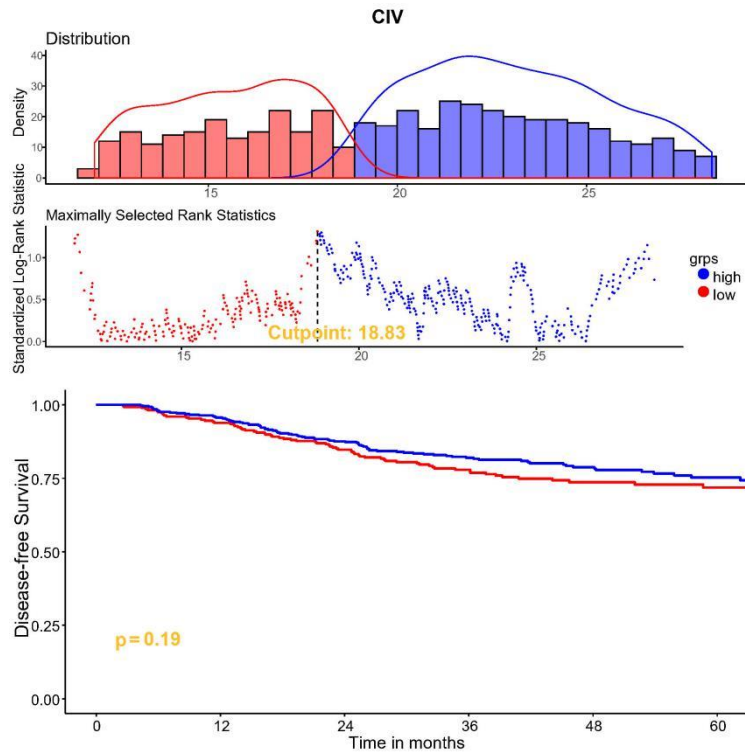

**Figure S1b.** Cutoff of CIV determined by the Maximally Selected Rank Statistics and survival curves stratified by the cutoff.

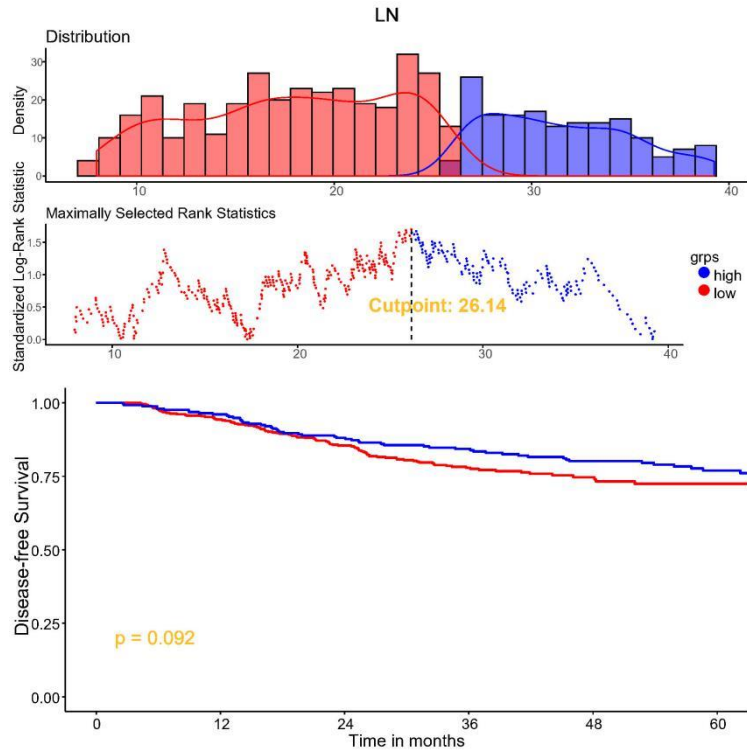

**Figure S1C.** Cutoff of LN determined by the Maximally Selected Rank Statistics and survival curves stratified by the cutoff.

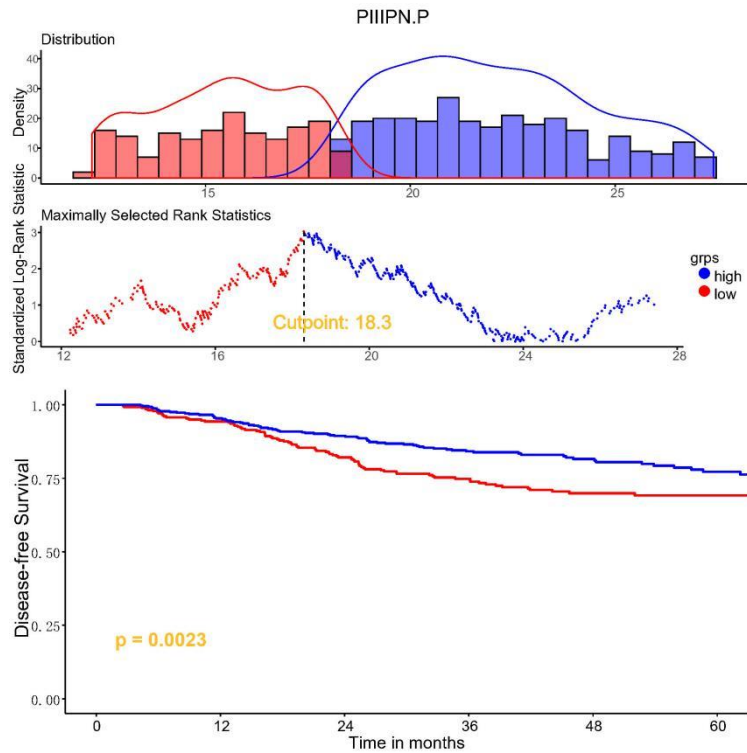

**Figure S1D.** Cutoff of PIIPN.P determined by the Maximally Selected Rank Statistics and survival curves stratified by the cutoff.



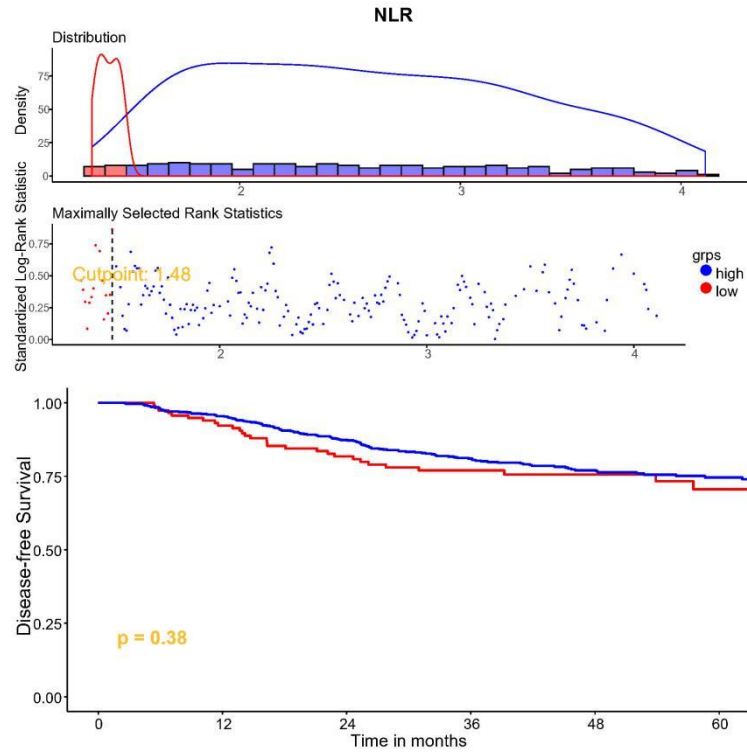

**Figure S1e.** Cutoff of NLR determined by the Maximally Selected Rank Statistics and survival curves stratified by the cutoff.

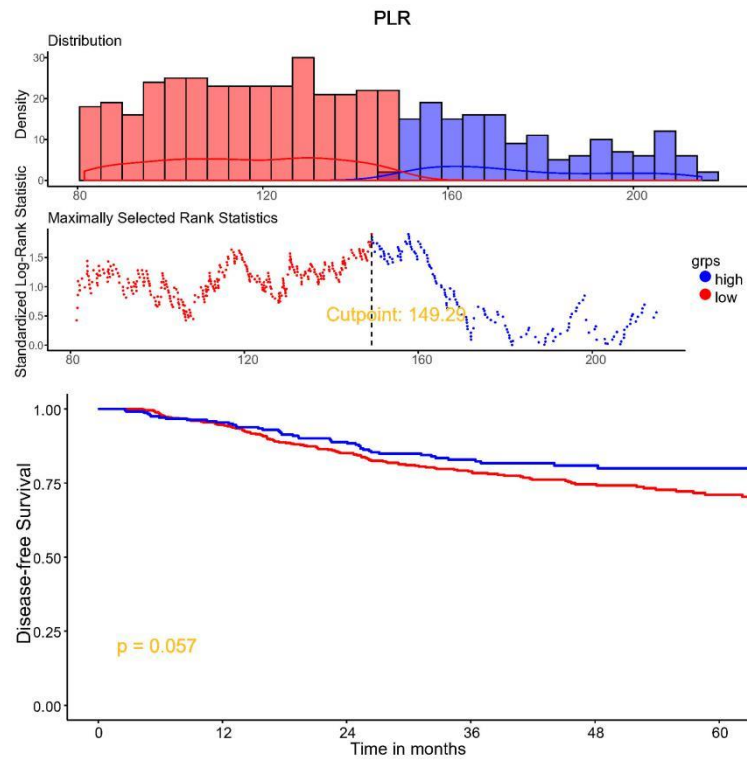

**Figure S1f.** Cutoff of PLR determined by the Maximally Selected Rank Statistics and survival curves stratified by the cutoff.

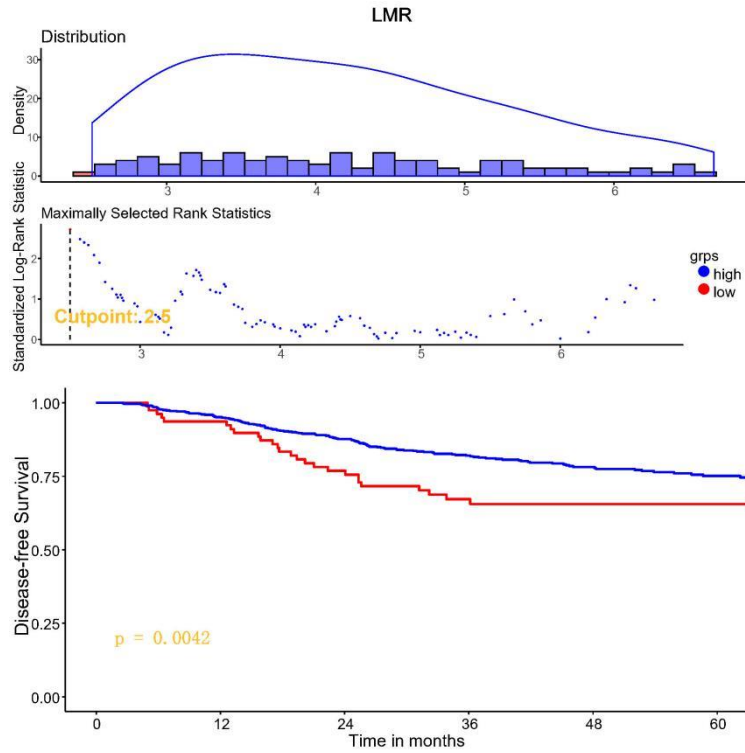

**Figure S1g.** Cutoff of LMR determined by the Maximally Selected Rank Statistics and survival curves stratified by the cutoff.

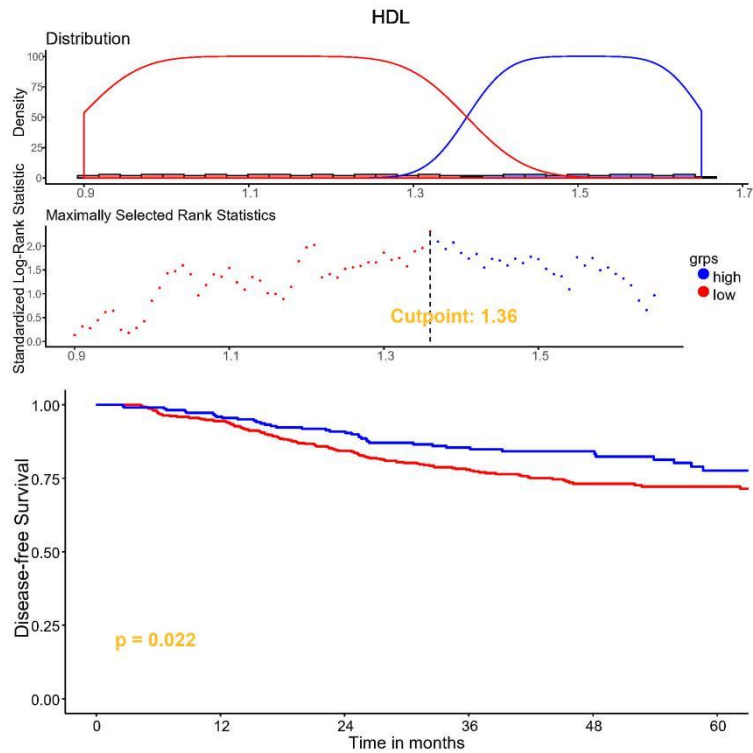

**Figure S1h.** Cutoff of HDL determined by the Maximally Selected Rank Statistics and survival curves stratified by the cutoff.

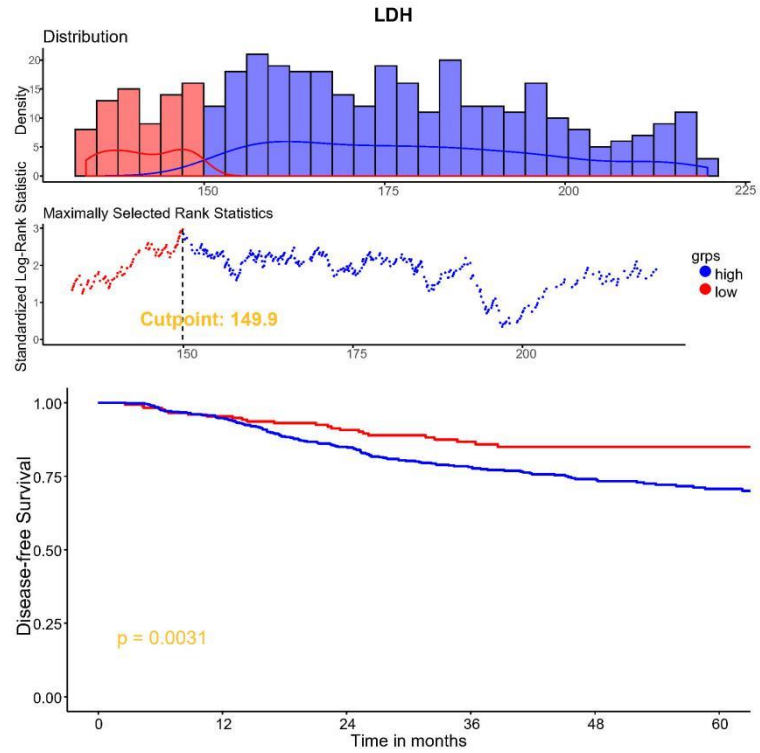

**Figure S1i** Cutoff of LDH determined by the Maximally Selected Rank Statistics and survival curves stratified by the cutoff.

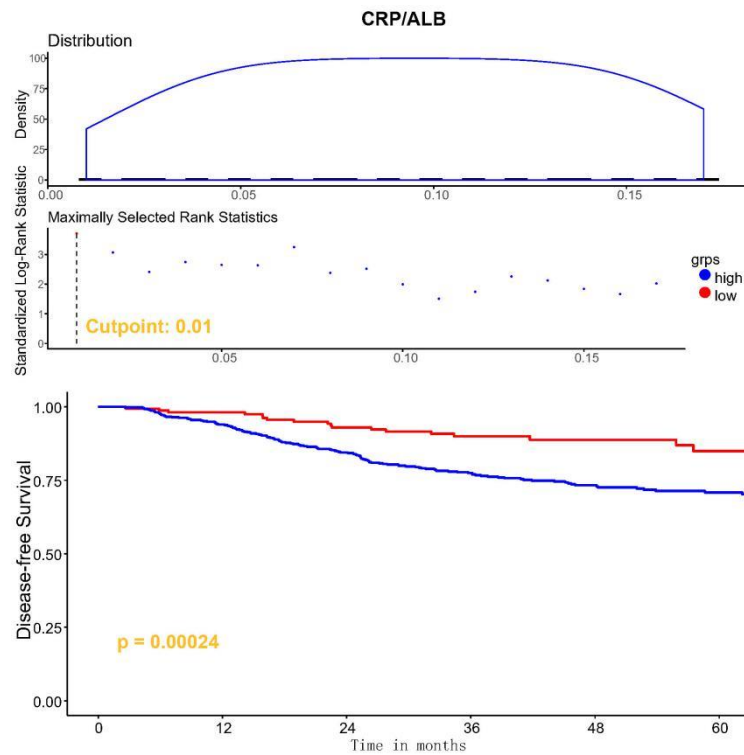

**Figure S1j.** Cutoff of CRP/ALB determined by the Maximally Selected Rank Statistics and survival curves stratified by the cutoff.

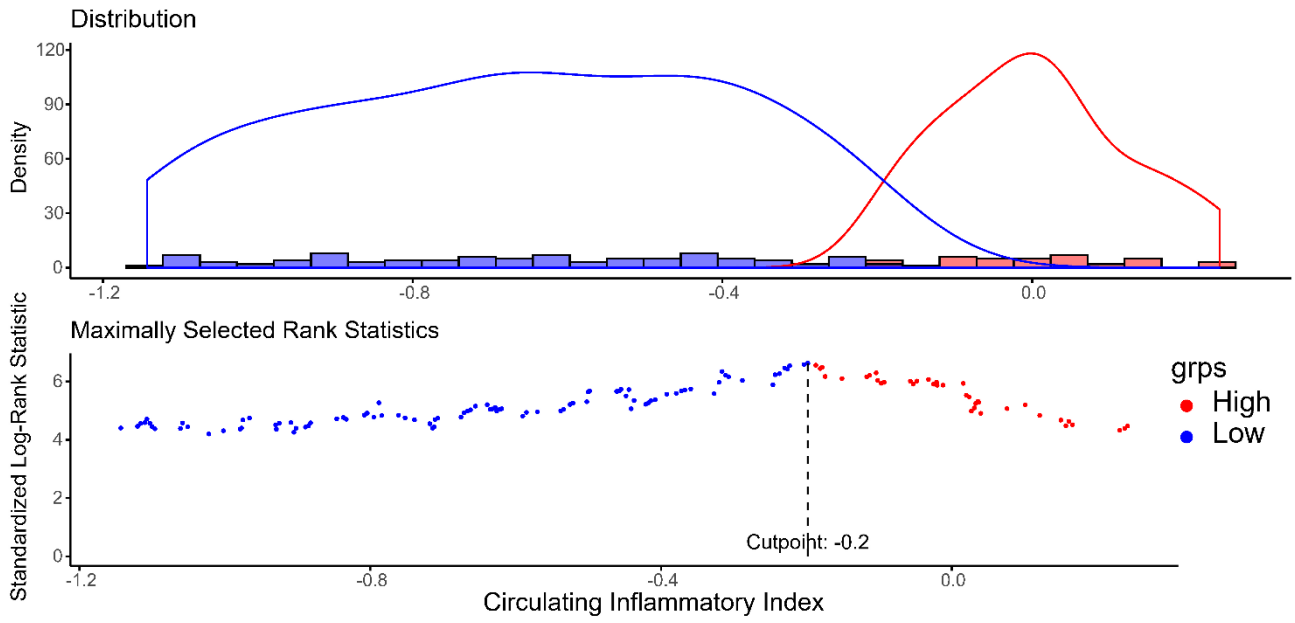

**Figure S2.** Cutoff of circulating inflammation signature determined by the Maximally Selected Rank Statistics.

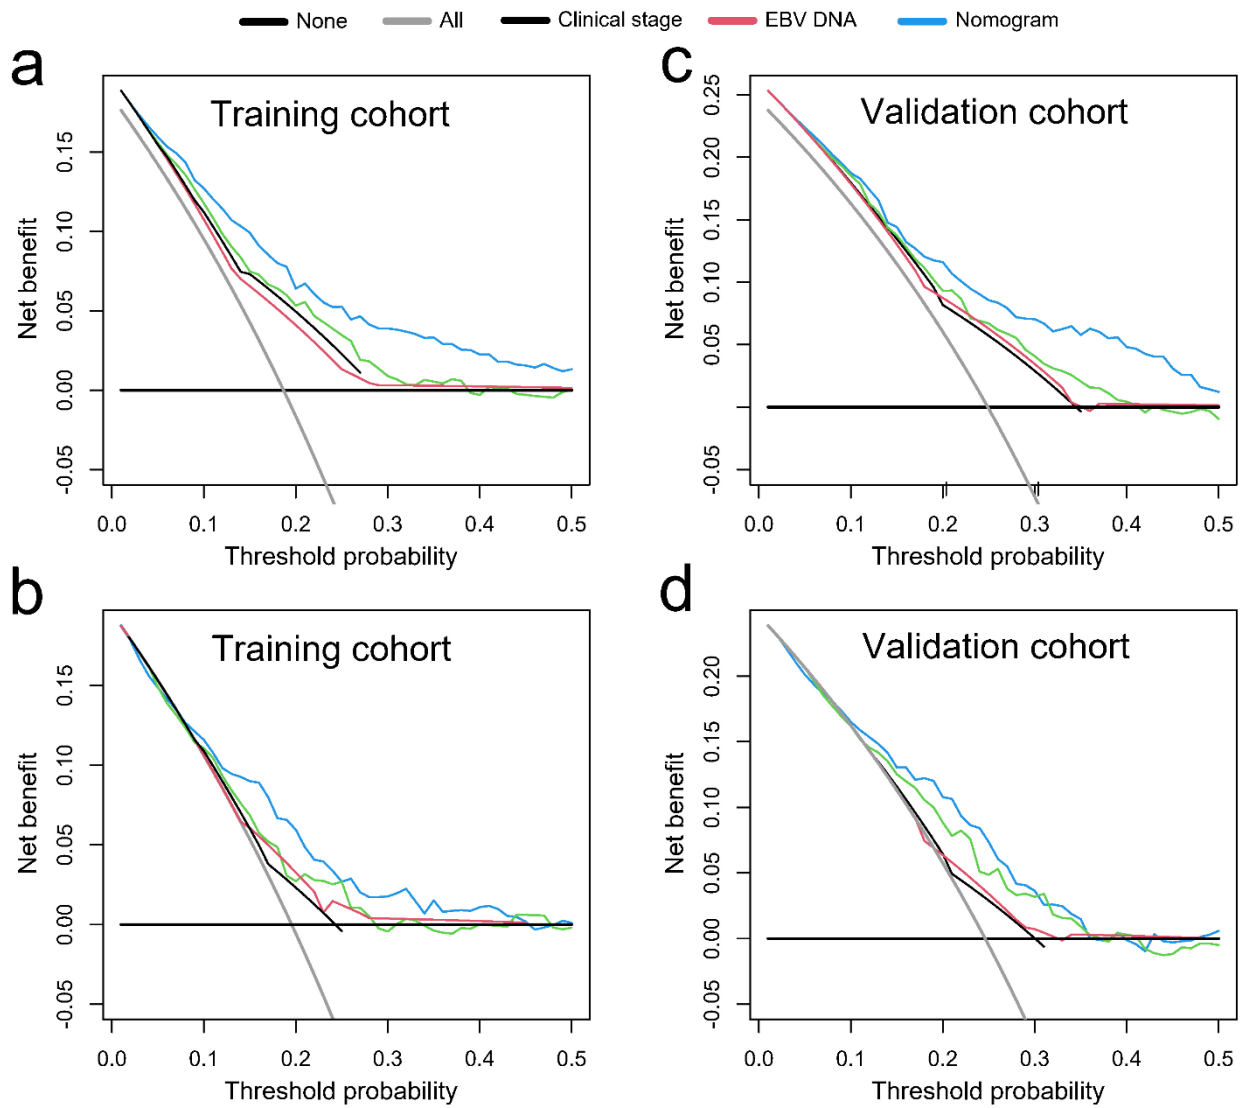

**Figure S3.** Decision curve analyses of the nomogram at 3- and 5-year in training and validation cohort. (a) at 3-year in the training cohort. (b) at 5-year in the training cohort. (c) at 3-year in the validation cohort. (d) at 5-year in the validation cohort.

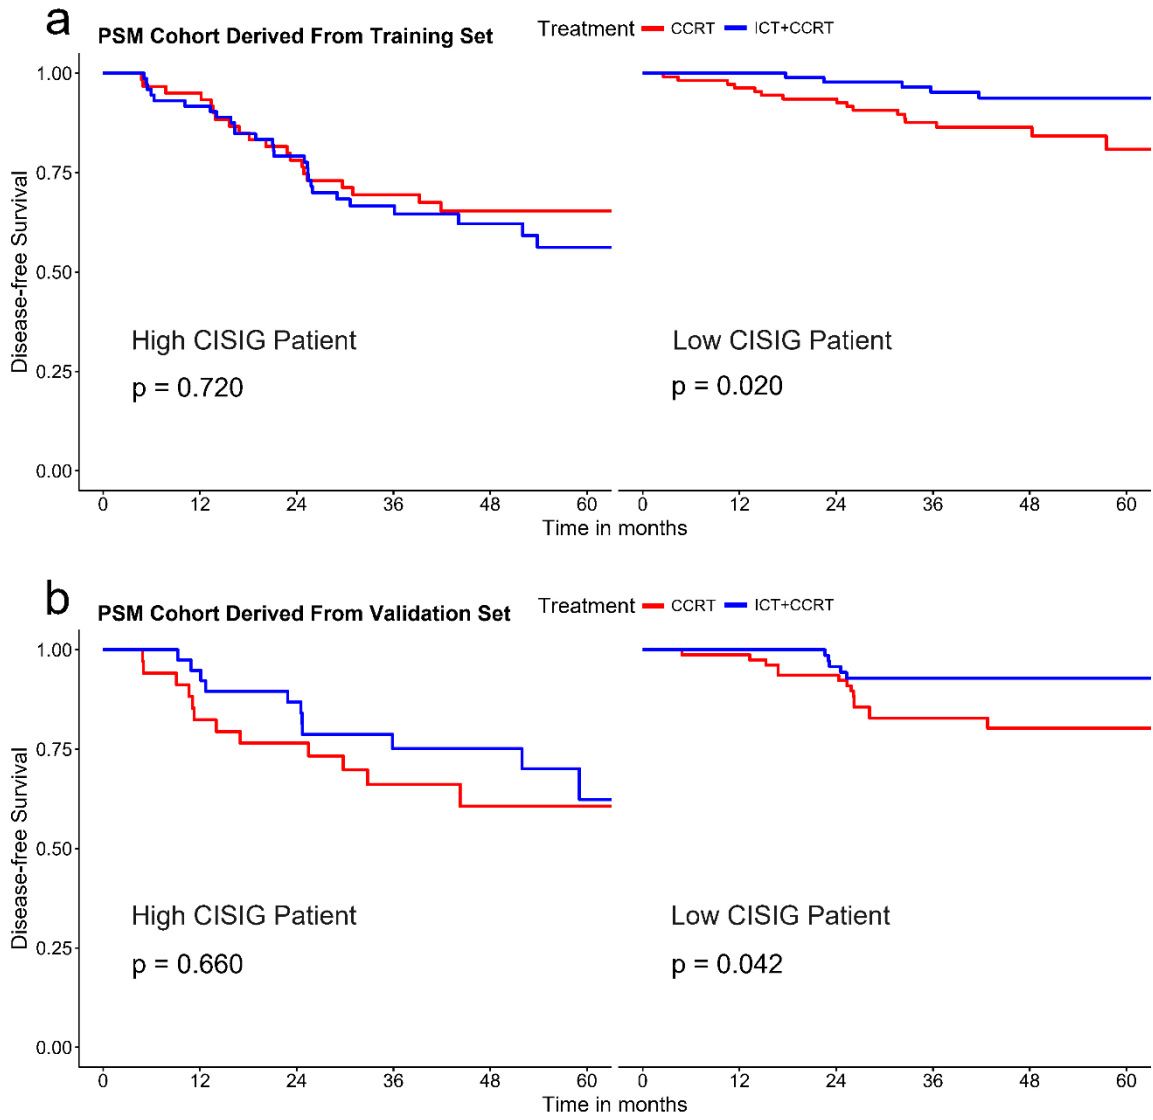

**Figure S4.** Survival curves of disease-free survival by treatment in matched patients with high or low circulating inflammation signature (CISIG) derived from the training (a) and validation cohorts (b).
